# Supplementary material
Source: publisher figshare collection journal article supplement (https://future-science-group.figshare.com/articles/dataset/_/22211317)
Supplement: Supplementary file 1 [file 1]

|  | **CX3CL1** | **GM-CSF** | **IFN-γ** | **IL-10** | **IL-12** | **IL-13** | **IL-17A** | **IL-1β** | **IL-2** | **IL-21** | **IL-23** | **IL-4** | **IL-5** | **IL-6** | **IL-7** | **IL-8** | **CXCL11** | **MIP-1α** | **MIP-1β** | **MIP-3α** | **TNF-α** | **TGF-β** |
| --- | --- | --- | --- | --- | --- | --- | --- | --- | --- | --- | --- | --- | --- | --- | --- | --- | --- | --- | --- | --- | --- | --- |
| **ALT (≥20 VS ＜20 U/L)** | 0.989 | 0.753 | 0.389 | 0.816 | 0.486 | 0.686 | 0.203 | 0.891 | 0.795 | 0.468 | 0.891 | 0.538 | 0.989 | 0.602 | 0.702 | 0.381 | 0.837 | 0.931 | 0.185 | 0.256 | 0.859 | 0.497 |
| **CT (＞35 VS ≤35)** | 0.370 | 0.225 | 0.075 | 0.334 | 0.300 | 0.770 | 0.220 | 0.311 | 0.887 | 0.229 | 0.364 | 0.465 | 0.144 | 0.871 | 0.128 | 0.406 | 0.981 | 0.370 | 0.540 | 0.322 | 0.572 | 0.340 |
| **Sex (Male VS Female)** | 0.794 | 0.481 | 0.481 | 0.276 | 0.425 | 0.529 | 0.214 | 0.540 | 0.613 | 0.133 | 0.530 | ***0.048*** | 0.319 | 0.600 | 0.408 | 0.618 | 0.290 | 0.783 | 0.290 | 0.137 | 0.571 | 0.975 |
| **Age (≥45 VS ＜45 years)** | 0.478 | 0.237 | 0.312 | 0.554 | 0.636 | 0.466 | 0.141 | **0.076** | 0.152 | **0.098** | 0.264 | 0.393 | 0.237 | 0.823 | 0.109 | 0.846 | ***0.027*** | 0.152 | **0.093** | 0.270 | 0.306 | 0.146 |
| **Anti-HBc (Positive VS Negative)** | 0.361 | 0.133 | 0.282 | 0.453 | 0.171 | 0.660 | 0.247 | 0.147 | 0.171 | 0.289 | 0.100 | 0.415 | 0.514 | 0.678 | 0.683 | 0.240 | **0.090** | 0.289 | 0.240 | 0.254 | **0.096** | 0.773 |
| **Anti-HBs ( Positive VS Negative)** | 0.881 | 0.548 | 0.764 | 0.643 | 0.717 | 0.636 | 0.871 | 0.557 | 0.754 | 0.960 | 0.540 | 0.960 | 0.960 | 0.569 | 0.990 | 0.212 | 0.599 | 0.460 | 0.671 | 0.484 | 0.565 | 0.436 |
| **Anti-HBe ( Positive VS Negative)** | 0.958 | 0.685 | 0.609 | 0.930 | 0.387 | 0.202 | 0.514 | 0.244 | 0.377 | 0.846 | 0.560 | 0.560 | 0.480 | 0.525 | 0.711 | 0.496 | ***0.035*** | 0.596 | 0.368 | 0.711 | 0.469 | 0.459 |

**Supplementary Table 2. P-values for the relationships between 21 plasma cytokine levels and demographic and clinical parameters in OBI subjects**

To assess the potential relationships between 21 plasma cytokines and demographic and clinical parameters of OBI subjects, comparisons for cytokine levels between subgroups based on sex, age, ALT, viral load, Anti-HBs, Anti-HBc and Anti-HBe were performed with the Mann-Whitney test in OBI group.

OBI: occult HBV infection; ALT: alanine aminotransferase; Ct: cycle threshold; Anti-HBc: antibody for Hepatitis B core antigen; Anti-HBs: antibody for HBsAg; Anti-HBe: antibody for HBeAg.
